# Supplementary material for: Surface ligand engineering involving fluorophenethyl ammonium for stable and strong emission CsPbBr3 quantum dots and high-performance QLEDs
Source: Royal Society of Chemistry journal article supplement (doi:10.1039/d2tc00034b), 2022-01-01
Supplement: d2tc00034b1.pdf [file d2tc00034b1.pdf]

## Supporting Information

### Surface Ligand Engineering Involving Fluorophenethyl ammonium for Stable and Strong Emission CsPbBr<sub>3</sub> Quantum Dots and High-Performance QLEDs

*Qiang Zhang<sup>a</sup>, Minghui Jiang<sup>a</sup>, Guijun Yan<sup>a</sup>, Yaqing Feng<sup>a,b</sup>, Bao Zhang<sup>\*a,b</sup>*

a School of Chemical Engineering and Technology, Tianjin University, Tianjin 300350, China.

b Guangdong Laboratory of Chemistry and Fine Chemical Industry Jieyang Center, Guangdong Province, 522000, P. R. China.

*E-mail address: [baozhang@tju.edu.cn](mailto:baozhang@tju.edu.cn) (Bao Zhang)*

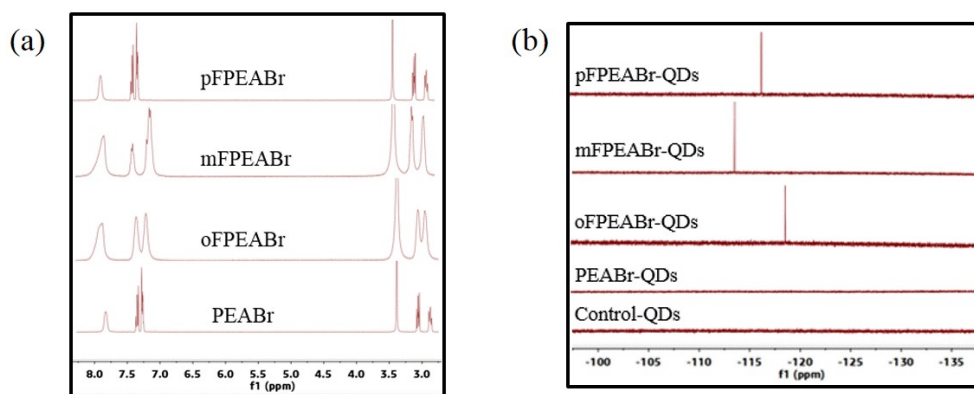

**Figure S1.** (a)  $^1\text{H}$ -NMR spectra of PEABr, oFPEABr, mFPEABr and pFPEABr. (b)  $^{19}\text{F}$ -NMR spectra of the  $\text{CsPbBr}_3$  QDs and the different ligands modified  $\text{CsPbBr}_3$  QDs.

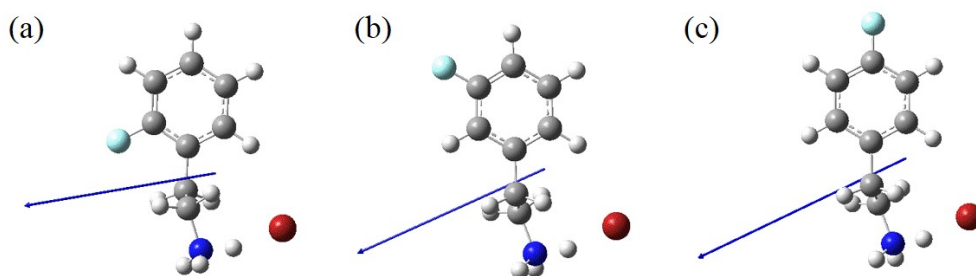

**Figure S2.** The direction and intensity of molecular dipole moments as indicated by the length of the arrows. (a-c)

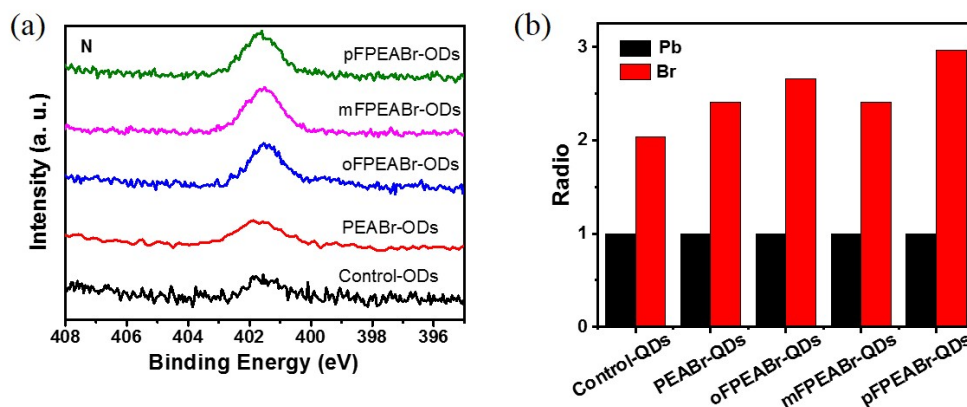

**Figure S3.** (a) N 1S, (b) The ratio of Pb and Br calculated by XPS data of the  $\text{CsPbBr}_3$  QDs and the different ligands modified  $\text{CsPbBr}_3$  QDs.

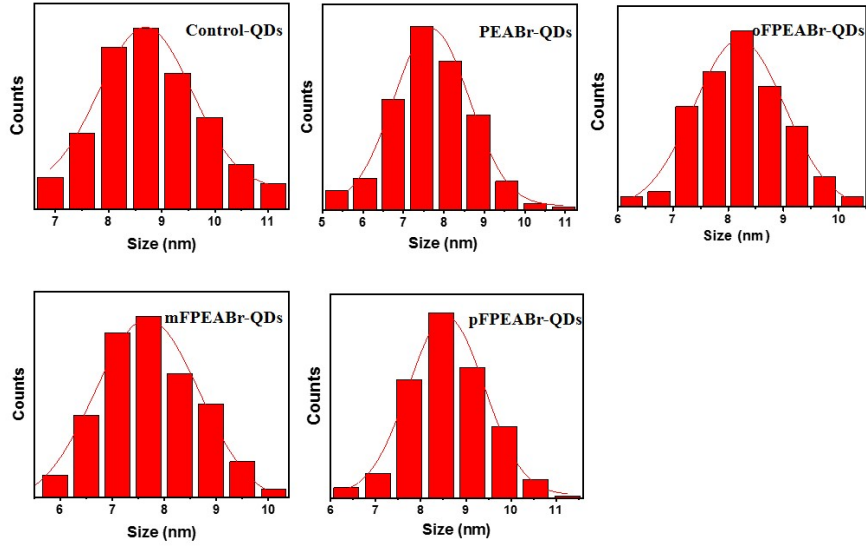

**Figure S4.** Size distribution histogram for the CsPbBr<sub>3</sub> QDs and the different ligands modified CsPbBr<sub>3</sub> QDs.

**Table S1.** The summary of PLQY, average lifetime ( $\tau_{ave}$ ), radiative recombination Life time ( $\tau_r$ ), radiative ( $k_r$ ) and nonradiative ( $k_{nr}$ ) decay rates of the CsPbBr<sub>3</sub> QDs and the different ligands modified CsPbBr<sub>3</sub> QDs. The  $\tau_{ave}$ ,  $\tau_r$ ,  $k_r$  and  $k_{nr}$  are calculated based on the

following formulas:

$$\tau_{ave} = \frac{A_1\tau_1^2 + A_2\tau_2^2}{A_1\tau_1 + A_2\tau_2}, \quad \tau_r = \frac{\tau_{ave}}{PLQY}, \quad k_r = \frac{1}{\tau_r}, \quad k_{nr} = \frac{1}{\tau_{ave}} - k_r \quad (\text{A1 and A2 are normalized coefficients})$$

| Sample      | PLQY(%) | $\tau_1$ (ns) | $\tau_2$ (ns) | $\tau_{ave}$ (ns) | $\tau_r$ (ns) | $k_r(\text{ns}^{-1})$ | $k_{nr}(\text{ns}^{-1})$ |
|-------------|---------|---------------|---------------|-------------------|---------------|-----------------------|--------------------------|
| Control-QDs | 65.89   | 11.53         | 48.32         | 37.48             | 56.88         | 0.018                 | 0.0091                   |
| PEABr-QDs   | 88.92   | 13.38         | 54.84         | 40.67             | 45.73         | 0.022                 | 0.0027                   |
| oFPEABr-QDs | 94.93   | 12.95         | 58.10         | 46.47             | 48.95         | 0.020                 | 0.0011                   |
| mFPEABr-QDs | 91      | 12.35         | 55.19         | 43.52             | 47.83         | 0.021                 | 0.0021                   |
| pFPEABr-QDs | 95.79   | 15.99         | 69.45         | 56.39             | 58.87         | 0.017                 | 0.0007                   |

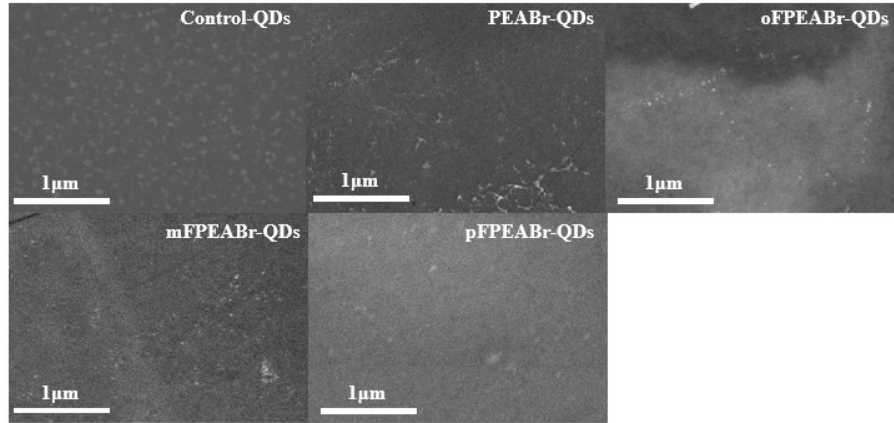

**Figure S5.** SEM images of the CsPbBr<sub>3</sub> QDs and the different ligands modified CsPbBr<sub>3</sub> QDs.

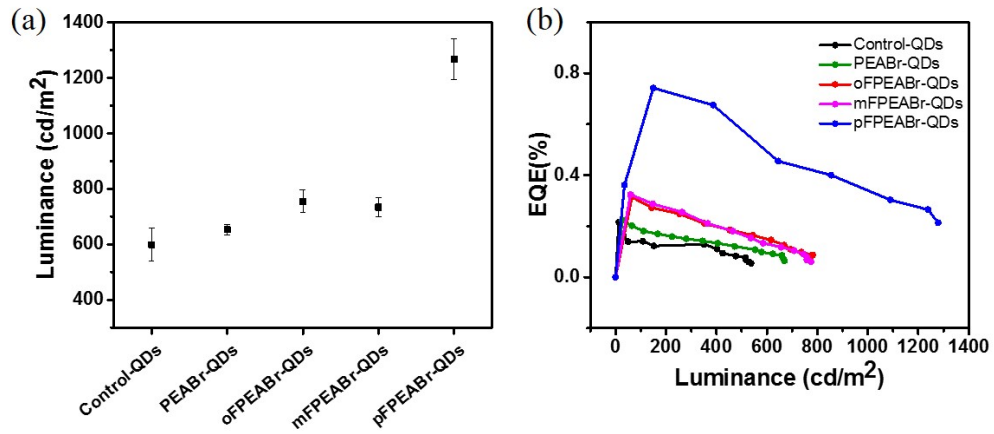

**Figure S6.** (a) Luminance, (b) EQE curves of the CsPbBr<sub>3</sub> QLEDs and the different ligands modified CsPbBr<sub>3</sub> QLEDs.
